# Supplementary material
Source: publisher figshare collection journal article supplement (https://diabetesjournals.figshare.com/ndownloader/files/23213693)
Supplement: Supplementary file 1 [file 23213693]

**Supplemental Table 1:** Comorbid Diagnoses and International Classification of Diseases, 9th/10th revision (ICD 9/10) codes

| Comorbid Diagnosis | ICD-9/-10 codes |
| --- | --- |
| Cognitive impairment | ICD9: 290.X, 291-293.X 294.0, 294.1, 294.2, 294.8, 294.9, 310.X, 331.X, 437.7, 438.0, 780.93, 797 ICD10: A50.45, F01.X, F03.9, F05, G04.32, G30.X, G31.X, G45.4, I67.3, R41.X, R54 |
| Cardiovascular disease | ICD9: 032.X, 036.X, 074.X, 112.81,115.X,130.3, 389.X, 391.X, 393, 394.X, 395-397.X, 398.X, 402.X, 404.X, 410- 416.X, 420.X, 421.X, 422.X, 423.X, 424.X, 425.X, 426-427.X, 429.X, 785.X, V42.2, V43.3, V45.0, V45.8, V53.X ICD10: A36.81, A38.1, A39.5X, B26.82, B33.2X, B37.6, B58.81, I01.X, I02.0, I05-I09.X(Except I09.81), I20-I25.X, I26-28.X, I30-I33.X, I34-I37.X, I38, I39, I40.X, I41, I42.X, I43, I44-I49.X, I51.X, I52, J10.82, M05.3, R00-R01.X, Z45.X, Z86.711, Z95.X, Z98.61 |
| Congestive heart failure | ICD9: 398.91, 428.X ICD10: I09.81, I50.X |
| Chronic kidney disease | ICD9: 403.X, 585.X, 792.5, V42.0, V45.1, V56.X ICD10: N18.X, R88.0, Z49.X, Z91.15, Z94.0, Z99.2 |
| Depression | ICD9: 296.2, 296.3, 311 ICD10: F32.X, F33.X, F34.X |
| Other psychiatric diagnoses | ICD9**:** 295.X, 296.X(Except 296.2X and 296.3X), 297-302.X, 306-319.X  ICD10: F04, F06.X, F07.X, F09, F20.X, F21, F22, F23, F24, F25.X, F28, F29,F30.X, F31.X, F39, F40.X, F41.X, F42, F43.X, F44.X, F45.X, F48.X, F50.X, F51.X, F52.X, F53, F54, F59, F60.X, F63.X, F64.X, F65.X, F66, F68.X, F69, F70, F71, F72, F73, F78-82, F84, F88-91, F93-95, F98-99, G25.61, G44.X, G47.X, G89.29, H93.X, N53.9, R37, R40.X, R45.X, R46.X, R48.X, R62.5, R63.2, R68.82, S06.9X0S, S09.90XS, T73.0XXA, Z55.3, Z62.891, Z71.41, Z72.X, Z73.X, Z81.X, Z87.X |
| Alcohol or substance abuse | ICD9: 303-305.X ICD10: F10-F19.X, F12.X, F14.X, F18.X |
| Hypoglycemia | ICD9: 251.0, 251.1, 251.2 ICD10: E08.641, E11.641, E11.649, E13.64, E13.641, E13.649, E16.0, E16.1, E15, E16.2 |
